# Supplementary material for: Country-level determinants of the severity of the first global wave of the COVID-19 pandemic: an ecological study
Source: PubMed Central journal article supplement — BMJ Open. 2021 Feb 3;11(2):e042034. doi: 10.1136/bmjopen-2020-042034 (PMC7868125; doi:10.1136/bmjopen-2020-042034), 2021-02-03
Supplement: bmjopen-2020-042034supp001.pdf [file bmjopen-2020-042034supp001.pdf]

| Country Name        | Country ISO3 | Mean Mortality Rate (daily increase in deaths) [up to 08/06/20] | Log Mean Mortality Rate (daily increase in deaths) [up to 08/06/20] | Population (millions) [2018] |
|---------------------|--------------|-----------------------------------------------------------------|---------------------------------------------------------------------|------------------------------|
| Argentina           | ARG          | 0.254453868                                                     | -1.368635774                                                        | 44.494502                    |
| Austria             | AUT          | 0.70305109                                                      | -0.352325708                                                        | 8.847037                     |
| Belgium             | BEL          | 7.861977577                                                     | 2.062038183                                                         | 11.422068                    |
| Brazil              | BRA          | 13.08982944                                                     | 2.571835518                                                         | 209.469333                   |
| Canada              | CAN          | 3.267152071                                                     | 1.183918715                                                         | 37.058856                    |
| Switzerland         | CHE          | 1.598400593                                                     | 0.469003499                                                         | 8.516543                     |
| Chile               | CHL          | 0.220118642                                                     | -1.513588548                                                        | 18.72916                     |
| Colombia            | COL          | 0.417602718                                                     | -0.873224735                                                        | 49.648685                    |
| Germany             | DEU          | 6.579157352                                                     | 1.883906722                                                         | 82.927922                    |
| Dominican Republic  | DOM          | 0.279192001                                                     | -1.275855541                                                        | 10.627165                    |
| Algeria             | DZA          | 0.874736667                                                     | -0.133832395                                                        | 42.228429                    |
| Ecuador             | ECU          | 0.805740535                                                     | -0.215993509                                                        | 17.084357                    |
| Egypt               | EGY          | 0.501979768                                                     | -0.689195454                                                        | 98.423595                    |
| Spain               | ESP          | 29.23356628                                                     | 3.375317574                                                         | 46.723749                    |
| Finland             | FIN          | 0.258884579                                                     | -1.351372957                                                        | 5.51805                      |
| France              | FRA          | 22.12519836                                                     | 3.096717119                                                         | 66.987244                    |
| United Kingdom of   | GBR          | 24.04783058                                                     | 3.180044889                                                         | 66.488991                    |
| Hungary             | HUN          | 0.375261575                                                     | -0.980131984                                                        | 9.768785                     |
| Indonesia           | IDN          | 0.716477156                                                     | -0.333408922                                                        | 267.663435                   |
| India               | IND          | 3.476038218                                                     | 1.24589324                                                          | 1352.617328                  |
| Ireland             | IRL          | 1.581101656                                                     | 0.458121866                                                         | 4.853506                     |
| Italy               | ITA          | 18.78667641                                                     | 2.933147907                                                         | 60.431283                    |
| Japan               | JPN          | 0.476880431                                                     | -0.740489483                                                        | 126.5291                     |
| Mexico              | MEX          | 7.145730972                                                     | 1.966515064                                                         | 126.190788                   |
| Netherlands (the)   | NLD          | 5.404974937                                                     | 1.687319756                                                         | 17.231017                    |
| Peru                | PER          | 2.04847312                                                      | 0.717094719                                                         | 31.989256                    |
| Philippines (the)   | PHL          | 0.457063943                                                     | -0.782931983                                                        | 106.651922                   |
| Poland              | POL          | 0.789834261                                                     | -0.235932156                                                        | 37.978548                    |
| Portugal            | PRT          | 1.029355645                                                     | 0.028933018                                                         | 10.281762                    |
| Romania             | ROU          | 0.599669456                                                     | -0.511376679                                                        | 19.473936                    |
| Russian Federation  | RUS          | 2.520816803                                                     | 0.924582958                                                         | 144.47805                    |
| Saudi Arabia        | SAU          | 0.476594448                                                     | -0.741089344                                                        | 33.699947                    |
| Sweden              | SWE          | 2.585143805                                                     | 0.94978112                                                          | 10.183175                    |
| Turkey              | TUR          | 3.484348059                                                     | 1.248281002                                                         | 82.319724                    |
| Ukraine             | UKR          | 0.30672127                                                      | -1.181815863                                                        | 44.622516                    |
| United States of An | USA          | 43.73626709                                                     | 3.778177738                                                         | 327.167434                   |
| South Africa        | ZAF          | 0.836880863                                                     | -0.178073555                                                        | 57.779622                    |

| <b>Log Population (millions) [2018]</b> | <b>Median age</b> | <b>% population aged 65 and older</b> | <b>Pollution levels</b> |
|-----------------------------------------|-------------------|---------------------------------------|-------------------------|
| 3.795365572                             | 31.532            | 11.198                                | 11.8                    |
| 2.18008256                              | 43.483            | 19.202                                | 12.4                    |
| 2.435547352                             | 41.928            | 18.571                                | 12.9                    |
| 5.344577312                             | 33.481            | 8.552                                 | 11.5                    |
| 3.612507343                             | 41.124            | 16.984                                | 6.5                     |
| 2.14201045                              | 43.053            | 18.436                                | 10.2                    |
| 2.930081606                             | 35.339            | 11.087                                | 21                      |
| 3.904971838                             | 31.307            | 7.646                                 | 15.2                    |
| 4.417971611                             | 45.744            | 21.453                                | 11.7                    |
| 2.363413572                             | 28.002            | 6.981                                 | 12.9                    |
| 3.743093729                             | 28.521            | 6.211                                 | 35.2                    |
| 2.838163137                             | 27.93             | 7.104                                 | 14.9                    |
| 4.589280605                             | 24.606            | 5.159                                 | 79.3                    |
| 3.844252586                             | 44.858            | 19.436                                | 9.5                     |
| 1.708024502                             | 43.128            | 21.228                                | 5.9                     |
| 4.204502106                             | 42.338            | 19.718                                | 11.6                    |
| 4.197036266                             | 40.467            | 18.517                                | 10.5                    |
| 2.279192209                             | 43.336            | 18.577                                | 15.6                    |
| 5.589730263                             | 29.744            | 5.319                                 | 15.6                    |
| 7.209796906                             | 28.426            | 5.989                                 | 65.2                    |
| 1.579701304                             | 38.246            | 13.928                                | 8.3                     |
| 4.10150671                              | 47.288            | 23.021                                | 15.3                    |
| 4.840472221                             | 48.358            | 27.049                                | 11.4                    |
| 4.837794781                             | 29.171            | 6.857                                 | 20.1                    |
| 2.846711159                             | 43.314            | 18.779                                | 12.1                    |
| 3.465399981                             | 30.984            | 7.151                                 | 24.3                    |
| 4.669570446                             | 25.687            | 4.803                                 | 18.4                    |
| 3.637021542                             | 41.678            | 16.763                                | 20.5                    |
| 2.330371618                             | 46.158            | 21.502                                | 7.9                     |
| 2.969076872                             | 43.171            | 17.85                                 | 14.3                    |
| 4.973127365                             | 39.586            | 14.178                                | 13.7                    |
| 3.517496347                             | 31.797            | 3.295                                 | 78.4                    |
| 2.320736885                             | 41.078            | 19.985                                | 5.9                     |
| 4.410610676                             | 31.549            | 8.153                                 | 42                      |
| 3.798238516                             | 41.178            | 16.462                                | 18.3                    |
| 5.790472031                             | 38.308            | 15.413                                | 7.4                     |
| 4.056636333                             | 27.621            | 5.344                                 | 23.6                    |

| <b>Mean Temperature (January-May) [2010-2016]</b> | <b>International Arrivals (millions) [2018]</b> | <b>Population Density</b> | <b>Diabetes prevalence (% of population ages 20 to 79) [2019]</b> |
|---------------------------------------------------|-------------------------------------------------|---------------------------|-------------------------------------------------------------------|
| 17.08312035                                       | 6.942                                           | 16.51475944               | 5.9                                                               |
| 3.60226965                                        | 30.816                                          | 109.289034                | 6.6                                                               |
| 7.198050499                                       | 9.119                                           | 382.7482166               | 4.6                                                               |
| 25.94433403                                       | 6.621                                           | 25.43142481               | 10.4                                                              |
| -13.5369606                                       | 21.134                                          | 4.150449826               | 7.6                                                               |
| 3.199521542                                       | 10.362                                          | 219.015538                | 5.7                                                               |
| 10.44359493                                       | 5.723                                           | 25.71000172               | 8.6                                                               |
| 25.36407089                                       | 3.904                                           | 45.86109419               | 7.4                                                               |
| 5.824878693                                       | 38.881                                          | 240.3716577               | 10.4                                                              |
| 23.65955734                                       | 6.569                                           | 224.5013245               | 8.6                                                               |
| 19.73687172                                       | 2.657                                           | 18.41134759               | 6.7                                                               |
| 22.18272591                                       | 2.535                                           | 71.03825093               | 5.5                                                               |
| 20.25822067                                       | 11.196                                          | 102.8021528               | 17.2                                                              |
| 10.04498005                                       | 82.773                                          | 93.73452887               | 6.9                                                               |
| -2.867335558                                      | 3.224                                           | 18.23264339               | 5.6                                                               |
| 8.096049309                                       | 89.322                                          | 119.2086157               | 4.8                                                               |
| 6.205169678                                       | 36.316                                          | 280.6018435               | 3.9                                                               |
| 7.352726936                                       | 17.552                                          | 106.7088258               | 6.9                                                               |
| 26.49332619                                       | 15.81                                           | 150.987056                | 6.3                                                               |
| 24.05548096                                       | 17.423                                          | 464.1494102               | 10.4                                                              |
| 7.058465958                                       | 10.926                                          | 71.6765278                | 3.2                                                               |
| 8.776521683                                       | 61.5672                                         | 205.5545931               | 5                                                                 |
| 5.503757954                                       | 31.192                                          | 346.9338179               | 5.6                                                               |
| 19.65898323                                       | 41.313                                          | 66.32513851               | 13.5                                                              |
| 6.944470882                                       | 18.78                                           | 508.1516311               | 5.4                                                               |
| 20.21702194                                       | 4.419                                           | 25.75925469               | 6.6                                                               |
| 25.9392662                                        | 7.168                                           | 367.5121072               | 7.1                                                               |
| 4.848646641                                       | 19.622                                          | 123.5888221               | 6.1                                                               |
| 12.17464447                                       | 16.186                                          | 111.3299159               | 9.8                                                               |
| 5.888294697                                       | 11.72                                           | 83.58031889               | 6.9                                                               |
| -12.54715347                                      | 24.551                                          | 8.911010468               | 6.1                                                               |
| 22.67894936                                       | 15.334                                          | 16.19483135               | 15.8                                                              |
| -2.283463001                                      | 7.44                                            | 24.61195594               | 4.8                                                               |
| 7.340251446                                       | 45.768                                          | 109.583913                | 11.1                                                              |
| 4.765891075                                       | 14.104                                          | 75.49154008               | 6.1                                                               |
| 2.793249846                                       | 79.74592                                        | 36.18535576               | 10.8                                                              |
| 20.85716248                                       | 10.472                                          | 48.89059344               | 12.7                                                              |

| <b>Prevalence - Neoplasms - Sex: Both - Age: Age-standardized (Percent) (%) [2017]</b> | <b>Median BMI</b> | <b>Prevalent Hypertension (%)</b> | <b>Smoking prevalence, 2016 total (ages 15+)</b> |
|----------------------------------------------------------------------------------------|-------------------|-----------------------------------|--------------------------------------------------|
| 1.176868831                                                                            | 27.7              | 22.6                              | 21.8                                             |
| 2.228314728                                                                            | 25.6              | 21                                | 29.6                                             |
| 2.129967521                                                                            | 26.1              | 17.5                              | 28.2                                             |
| 0.775327051                                                                            | 26.6              | 23.3                              | 13.9                                             |
| 4.629727772                                                                            | 26.9              | 13.2                              | 14.3                                             |
| 2.110949955                                                                            | 25.2              | 18                                | 25.7                                             |
| 1.237788506                                                                            | 28                | 20.9                              | 37.8                                             |
| 0.875953763                                                                            | 26.2              | 19.2                              | 9                                                |
| 2.398478606                                                                            | 26.6              | 19.9                              | 30.6                                             |
| 0.753248307                                                                            | 26.5              | 21.5                              | 13.7                                             |
| 0.581716794                                                                            | 25.5              | 25.1                              | 15.6                                             |
| 0.693830173                                                                            | 27.3              | 17.9                              | 7.1                                              |
| 0.543731123                                                                            | 29.6              | 25                                | 25.2                                             |
| 2.119853473                                                                            | 25.9              | 19.2                              | 29.3                                             |
| 2.353037036                                                                            | 25.9              | 19.4                              | 20.4                                             |
| 2.091774092                                                                            | 25                | 22                                | 32.7                                             |
| 2.791155517                                                                            | 27.1              | 15.2                              | 22.3                                             |
| 1.7429261                                                                              | 27.3              | 30                                | 30.6                                             |
| 0.426835825                                                                            | 23.1              | 23.8                              | 39.4                                             |
| 0.312306273                                                                            | 21.8              | 25.8                              | 11.5                                             |
| 2.354530107                                                                            | 27.5              | 19.7                              | 24.3                                             |
| 2.277105536                                                                            | 25.6              | 21.2                              | 23.7                                             |
| 2.985185404                                                                            | 22.7              | 17.6                              | 22.1                                             |
| 0.894715491                                                                            | 28                | 19.7                              | 14                                               |
| 2.818549509                                                                            | 25.6              | 18.7                              | 25.8                                             |
| 0.655925982                                                                            | 26.7              | 13.7                              | 4.8                                              |
| 0.593539368                                                                            | 23.2              | 22.6                              | 24.3                                             |
| 1.635208395                                                                            | 26.7              | 28.7                              | 28                                               |
| 1.761483237                                                                            | 25.6              | 24.4                              | 22.7                                             |
| 1.633056952                                                                            | 26.9              | 30                                | 29.7                                             |
| 1.754436206                                                                            | 26.2              | 27.2                              | 39.3                                             |
| 0.908721275                                                                            | 28.5              | 23.3                              | 15.6                                             |
| 2.433869445                                                                            | 26                | 19.3                              | 18.8                                             |
| 0.95246871                                                                             | 27.9              | 20.3                              | 27.2                                             |
| 1.602203378                                                                            | 26.6              | 27.1                              | 28.9                                             |
| 5.42440701                                                                             | 28.9              | 12.9                              | 21.8                                             |
| 0.556269555                                                                            | 27.3              | 26.9                              | 20.3                                             |

| Hospital beds (per 10,000 pop) | WHO health index | Population living in urban areas (%) | GDP per capita, PPP (current international 10,000\$) [2018] |
|--------------------------------|------------------|--------------------------------------|-------------------------------------------------------------|
| 50                             | 0.722            | 91                                   | 2.061056855                                                 |
| 76                             | 0.959            | 65.9                                 | 5.545468929                                                 |
| 62                             | 0.915            | 97.6                                 | 5.140799834                                                 |
| 22                             | 0.573            | 84.3                                 | 1.609640096                                                 |
| 27                             | 0.881            | 80.9                                 | 4.813025597                                                 |
| 47                             | 0.916            | 73.7                                 | 6.806094105                                                 |
| 22                             | 0.87             | 88.6                                 | 2.522252778                                                 |
| 15                             | 0.91             | 75                                   | 1.501293027                                                 |
| 83                             | 0.902            | 74.3                                 | 5.307454012                                                 |
| 16                             | 0.789            | 73.8                                 | 1.774818532                                                 |
| 19                             | 0.701            | 67.5                                 | 1.548178762                                                 |
| 15                             | 0.619            | 62.7                                 | 1.173438739                                                 |
| 16                             | 0.752            | 43                                   | 1.24123094                                                  |
| 30                             | 0.972            | 78.4                                 | 3.971543906                                                 |
| 44                             | 0.881            | 83.6                                 | 4.841693603                                                 |
| 65                             | 0.994            | 78.3                                 | 4.534239574                                                 |
| 28                             | 0.925            | 81.3                                 | 4.59735735                                                  |
| 70                             | 0.743            | 68.9                                 | 3.110250275                                                 |
| 12                             | 0.66             | 49.9                                 | 1.30796193                                                  |
| 7                              | 0.617            | 30.9                                 | 0.776288177                                                 |
| 28                             | 0.924            | 61.8                                 | 8.320339468                                                 |
| 34                             | 0.991            | 68.3                                 | 4.183042633                                                 |
| 134                            | 0.957            | 90.5                                 | 4.279745852                                                 |
| 15                             | 0.755            | 77.8                                 | 1.984464567                                                 |
| 47                             | 0.928            | 87.1                                 | 5.632894114                                                 |
| 16                             | 0.547            | 76.9                                 | 1.441807067                                                 |
| 5                              | 0.755            | 45.3                                 | 0.895108565                                                 |
| 65                             | 0.793            | 60.9                                 | 3.13366035                                                  |
| 34                             | 0.945            | 60.6                                 | 3.34154379                                                  |
| 63                             | 0.645            | 53.8                                 | 2.820635705                                                 |
| 82                             | 0.544            | 73.7                                 | 2.758812544                                                 |
| 27                             | 0.894            | 82.1                                 | 5.533567959                                                 |
| 26                             | 0.908            | 85.1                                 | 5.320888436                                                 |
| 27                             | 0.734            | 70.7                                 | 2.806885941                                                 |
| 88                             | 0.708            | 68.7                                 | 0.924946213                                                 |
| 29                             | 0.838            | 80.8                                 | 6.279458565                                                 |
| 28                             | 0.319            | 62.2                                 | 1.368688236                                                 |

| Total COVID-19 tests per 1000 population (23/01/2020-08/06/2020) | Mean % of BCG vaccination coverage among 1 year old children (1980-2019) | Country-level average daily ambient ultraviolet radiation (UVR) level - 2004 | Stringency Index Total |
|------------------------------------------------------------------|--------------------------------------------------------------------------|------------------------------------------------------------------------------|------------------------|
| 4.453                                                            | 93.69999695                                                              | 3476                                                                         | 93.48109436            |
| 54.934                                                           | 22.5                                                                     | 1888                                                                         | 85.19000244            |
| 85.212                                                           | 0                                                                        | 1645                                                                         | 74.07343292            |
|                                                                  | 88.55000305                                                              | 4552                                                                         | 76.73246765            |
| 51.14                                                            | 0                                                                        | 1887                                                                         | 71.65020752            |
| 49.728                                                           | 0                                                                        | 2158                                                                         | 73.24888611            |
| 37.706                                                           | 95.90000153                                                              | 3982                                                                         | 73.15000153            |
| 8.184                                                            | 86.59999847                                                              | 5385                                                                         | 87.03500366            |
|                                                                  | 0                                                                        | 1812                                                                         | 68.25333405            |
| 9.043                                                            | 80.97499847                                                              | 4880                                                                         | 89.80999756            |
|                                                                  | 84.65000153                                                              | 3253                                                                         | 77.63316345            |
| 4.579                                                            | 93.94999695                                                              | 4929                                                                         | 93.51999664            |
|                                                                  | 88.22499847                                                              | 4202                                                                         | 83.8278656             |
|                                                                  | 0                                                                        | 2705                                                                         | 70.95444489            |
| 38.309                                                           | 64                                                                       | 1494                                                                         | 59.09785461            |
|                                                                  | 56.82500076                                                              | 1907                                                                         | 74.44837952            |
| 59.799                                                           | 0                                                                        | 1576                                                                         | 56.70891953            |
| 21.792                                                           | 99                                                                       | 1932                                                                         | 75.38137817            |
| 1.003                                                            | 79.05000305                                                              | 5220                                                                         | 68.05999756            |
| 3.46                                                             | 63.47499847                                                              | 4514                                                                         | 89.49436188            |
| 74.011                                                           | 58.22499847                                                              | 1509                                                                         | 88.42713928            |
| 70.518                                                           | 0                                                                        | 2444                                                                         | 82.60578918            |
| 2.376                                                            | 59.25                                                                    | 2521                                                                         | 44.48974991            |
| 2.888                                                            | 85.02500153                                                              | 4974                                                                         | 81.5681839             |
|                                                                  | 0                                                                        | 1662                                                                         | 73.73036957            |
| 6.087                                                            | 84.17500305                                                              | 5906                                                                         | 93.75784302            |
| 3.805                                                            | 85.07499695                                                              | 4928                                                                         | 96.26882172            |
| 25.724                                                           | 94.30000305                                                              | 1749                                                                         | 78.28689575            |
| 94.2                                                             | 75.25                                                                    | 2585                                                                         | 83.40107727            |
| 26.309                                                           | 82.625                                                                   | 2071                                                                         | 85.55750275            |
| 90.826                                                           | 66.42500305                                                              | 1795                                                                         | 82.5987854             |
| 29.844                                                           | 89.07499695                                                              | 5384                                                                         | 88.22161865            |
|                                                                  | 17.22500038                                                              | 1587                                                                         | 36.85228729            |
| 28.195                                                           | 86                                                                       | 2924                                                                         | 75.08468628            |
| 9.857                                                            | 62.79999924                                                              | 1843                                                                         | 92.20458221            |
| 70.074                                                           | 0                                                                        | 2736                                                                         | 58.52120209            |
| 15.901                                                           | 74.05000305                                                              | 4111                                                                         | 85                     |
